# Supplementary material for: Periodic and incommensurately modulated phases in a (2-methylimidazolium)tetraiodobismuthate(iii) thermochromic organic–inorganic hybrid
Source: Royal Society of Chemistry journal article supplement (doi:10.1039/c5ce00046g), 2015-01-01
Supplement: c5ce00046g1.pdf [file c5ce00046g1.pdf]

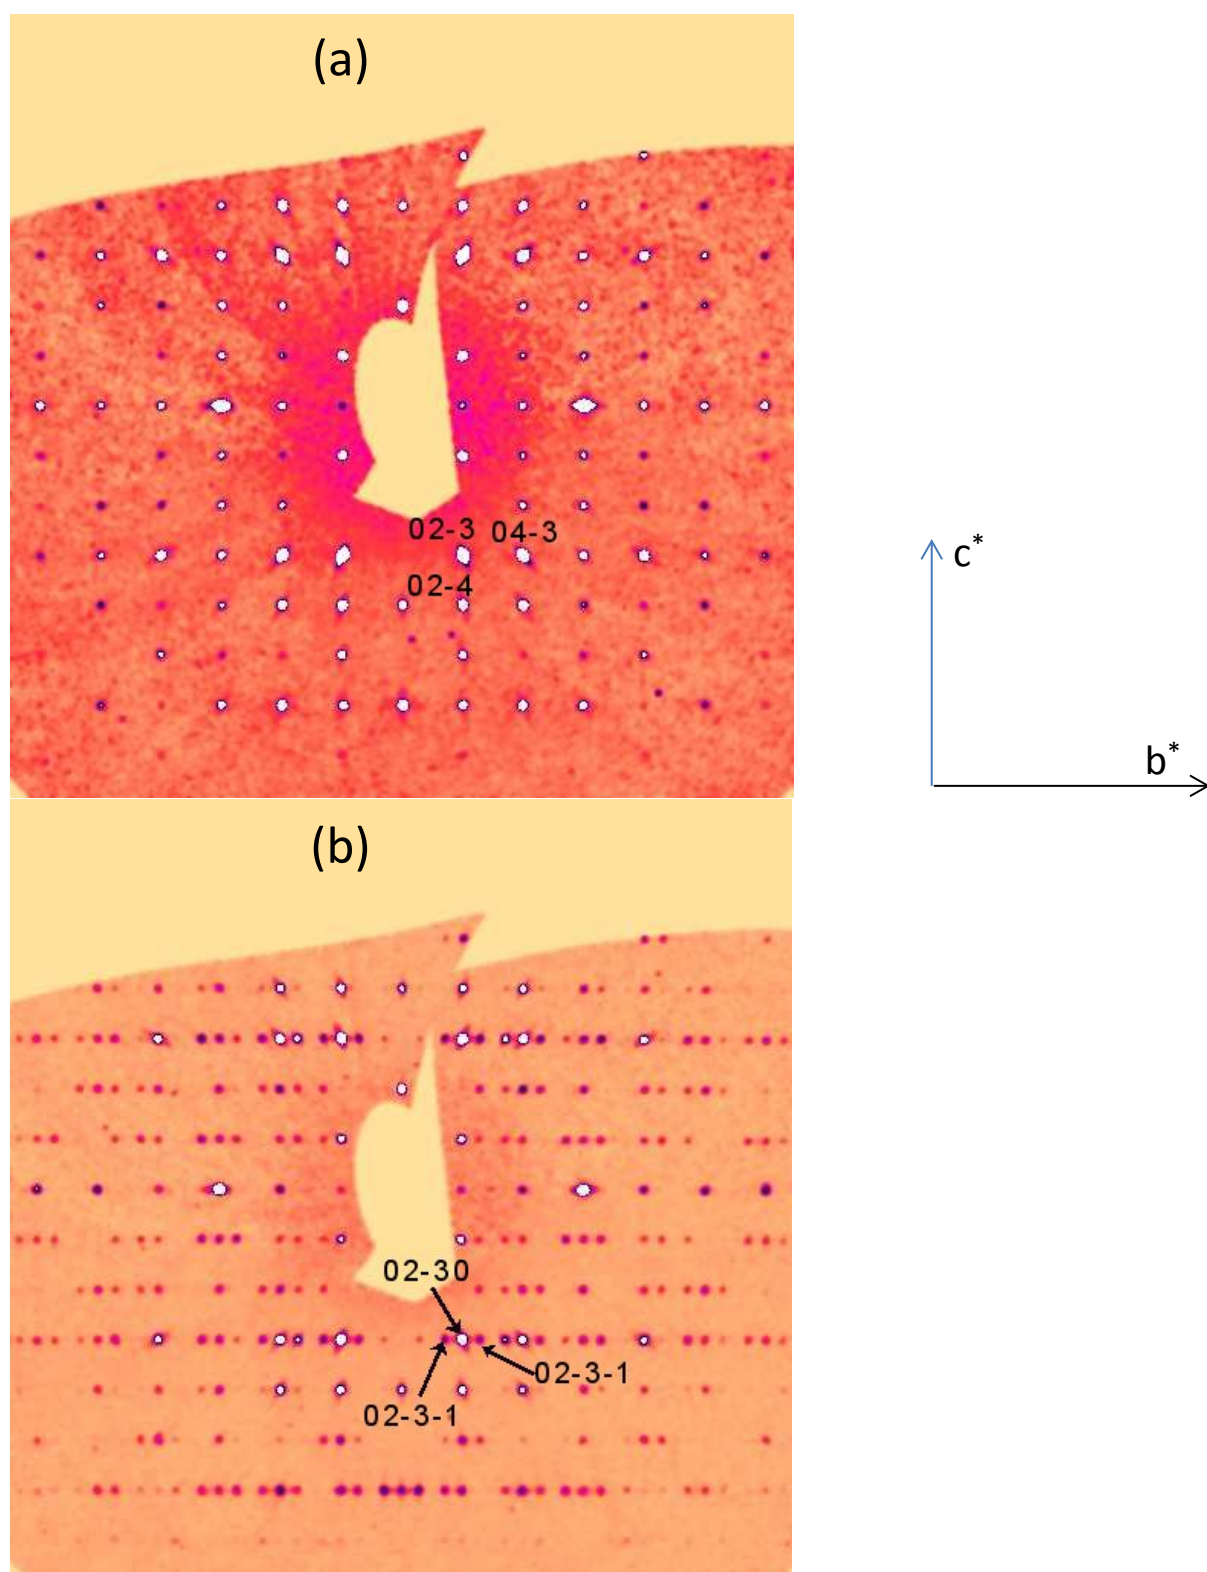

S1. Reciprocal space reconstructions at 330 K (a) and at 150 K (b); 0kl layers.

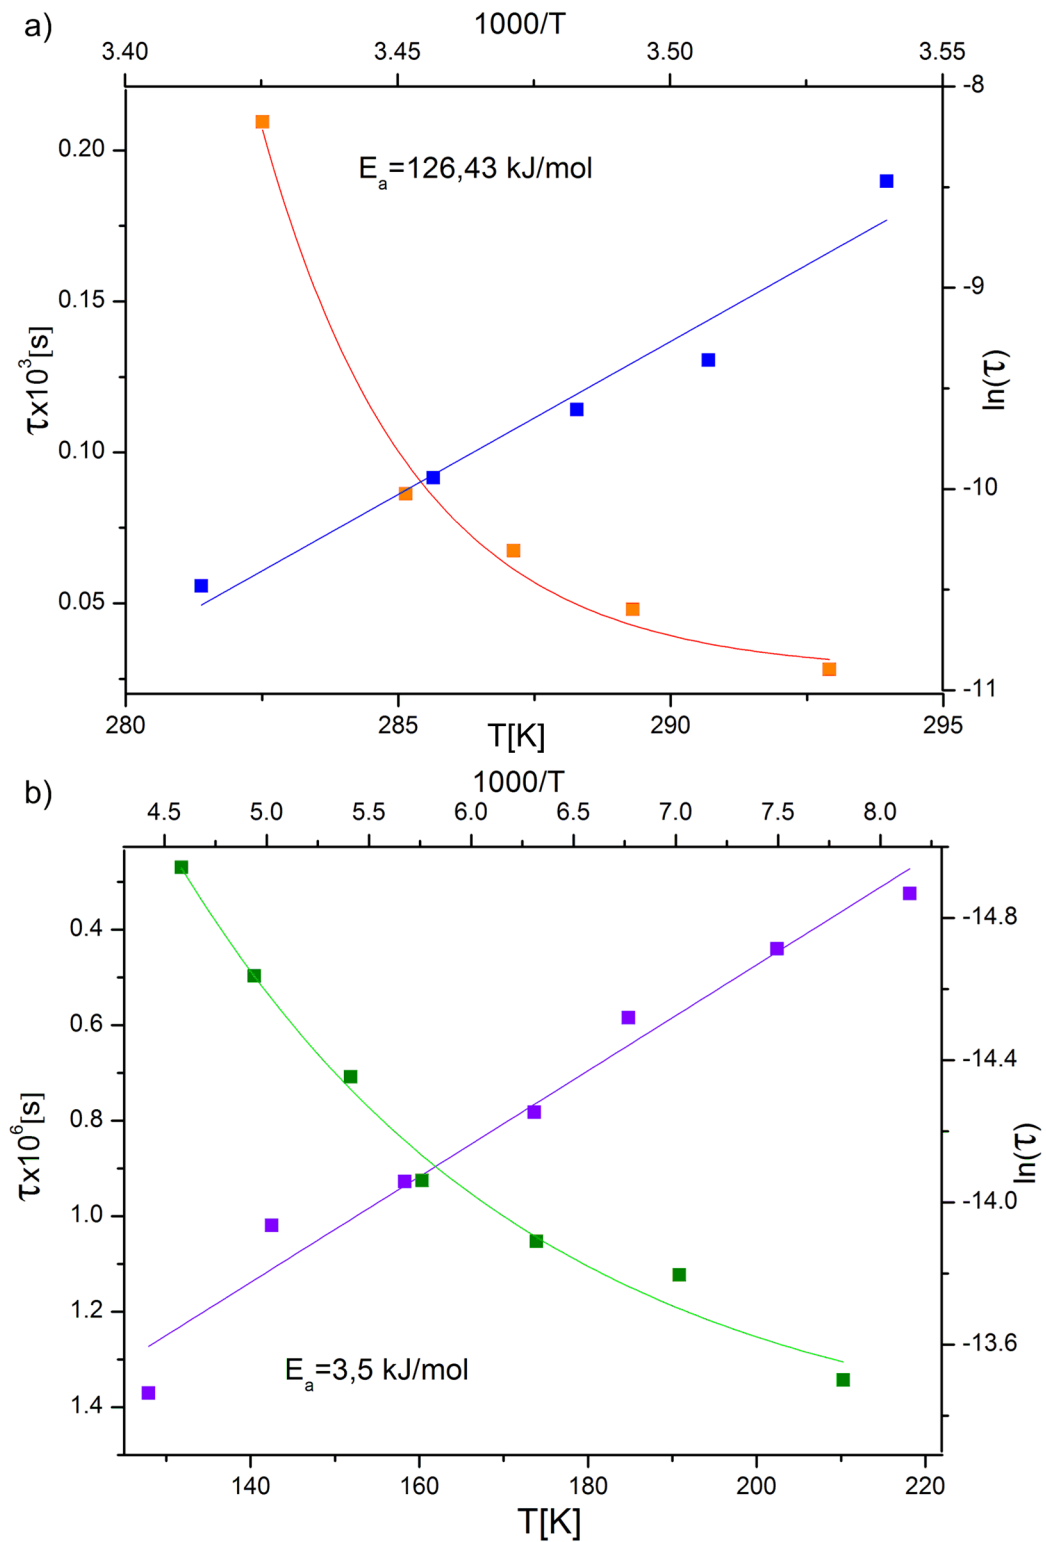

S2. The temperature dependence of the macroscopic relaxation time ( $\tau$ ) and Arrhenius relation.
